# Supplementary material for: Analyzing Business Model Canvas in Design Education and its Role in Design - Driven Startups
Source: Research Square preprint supplement (doi:10.21203/rs.3.rs-6357868/v1), 2025-05-13
Supplement: Supplementary file 1 [file 855662d29a53b8a50a4ead1e.docx]

**Table 1**

*Keyword analysis of the identified literature*

| **Keywords** | **Name of Cluster** | **Occurrence** |
| --- | --- | --- |
| Abstract | **Creative Economy, Policy, and Culture** | 17 |
| Account | 17 |
| Art | 82 |
| Artist | 28 |
| Australia | 13 |
| Barrier | 18 |
| Benefit | 20 |
| China | 26 |
| City | 93 |
| Creative | 23 |
| Creative activity | 21 |
| Creative business | 13 |
| Creative city | 38 |
| Creative class | 18 |
| Creative cluster | 19 |
| Creative industries | 64 |
| Creative work | 27 |
| Creative worker | 18 |
| Cultural policy | 27 |
| Cultural sector | 12 |
| Decade | 26 |
| Designer | 15 |
| Difference | 22 |
| Discourse | 24 |
| Diversity | 22 |
| Dynamic | 31 |
| Economic | 16 |
| Effect | 33 |
| Emergence | 17 |
| Europe | 16 |
| Fact | 12 |
| Focus | 25 |
| Force | 18 |
| Formation | 18 |
| Heritage | 16 |
| Higher education | 15 |
| Identity | 21 |
| Individual | 15 |
| Interaction | 18 |
| Interest | 20 |
| Kind | 13 |
| Life | 25 |
| Mechanism | 27 |
| Nature | 27 |
| Notion | 17 |
| Outcome | 18 |
| Policy | 90 |
| Policy maker | 12 |
| Policymaker | 15 |
| Politic | 14 |
| Possibility | 14 |
| Practice | 81 |
| Practitioner | 18 |
| Range | 18 |
| Recent year | 12 |
| Regard | 11 |
| Rise | 15 |
| Significance | 21 |
| Space | 37 |
| State | 26 |
| Talent | 22 |
| Time | 27 |
| University | 33 |
| Work | 60 |
| Action | **Creative Industries and Economic Development** | 11 |
| Addition | 19 |
| Advertising | 14 |
| Architecture | 14 |
| CCI | 10 |
| Cluster | 25 |
| Competitiveness | 17 |
| Connection | 16 |
| Cooperation | 18 |
| Craft | 17 |
| Creative Sector | 39 |
| Cultural | 40 |
| Cultural Heritage | 14 |
| Cultural Industry | 26 |
| Dimension | 17 |
| Direction | 17 |
| Economic development | 29 |
| Economic growth | 35 |
| Employment | 38 |
| Evolution | 14 |
| Fashion | 17 |
| GDP | 13 |
| Hand | 17 |
| Importance | 45 |
| Increase | 15 |
| Indicator | 17 |
| Interpretation | 12 |
| Local development | 12 |
| Mapping | 17 |
| Music | 16 |
| Perception | 17 |
| Point | 17 |
| Population | 14 |
| Professional | 23 |
| Program | 31 |
| Promotion | 15 |
| Reflection | 14 |
| Region | 54 |
| Regional development | 12 |
| Research question | 10 |
| Research result | 12 |
| Science | 20 |
| Sustainable development | 15 |
| Tourism | 33 |
| Trend | 41 |
| Ukraine | 10 |
| View | 19 |
| Visual art | 10 |
| World | 29 |
| Application | **Business Model Canvas, Entrepreneurship and Strategic Innovation** | 41 |
| Bandung | 12 |
| Block | 15 |
| BMC | 26 |
| Business model | 83 |
| Business Model Canvas | 65 |
| Business Model Innovation | 11 |
| Canvas | 27 |
| Case study | 70 |
| Company | 45 |
| Component | 25 |
| Covid | 17 |
| Creative Community | 12 |
| Customer | 24 |
| Data | 89 |
| Depth interview | 19 |
| Effort | 25 |
| Element | 43 |
| Existence | 15 |
| Future | 23 |
| Income | 16 |
| Indonesia | 11 |
| Information | 29 |
| Integration | 18 |
| Keywords | 13 |
| Map | 17 |
| Marketing | 23 |
| Object | 21 |
| Observation | 37 |
| Pandemic | 18 |
| Quality | 18 |
| Researcher | 14 |
| Resource | 57 |
| Respondent | 14 |
| Secondary data | 11 |
| Semi | 10 |
| SMES | 13 |
| Solution | 31 |
| Startup | 14 |
| Strategy | 79 |
| Strength | 16 |
| Structure | 28 |
| Student | 37 |
| Swot Analysis | 11 |
| Tool | 70 |
| Value Proposition | 19 |
| Weakness | 11 |
| Category | **Design Methodology** | 16 |
| Comparison | 13 |
| Creative entrepreneuship | 20 |
| Design Methodology approach | 11 |
| Design Education | 3 |
| Employee | 12 |
| Entrepreneur | 101 |
| Evidence | 31 |
| Firm | 27 |
| Implication | 40 |
| Location | 30 |
| Manager | 19 |
| Number | 35 |
| Originality value | 11 |
| Performance | 27 |
| Sample | 19 |
| Set | 21 |
| Variety | 12 |
